# Supplementary material for: Transfer hydrogenation with a ferrocene diamide ruthenium complex
Source: Royal Society of Chemistry journal article supplement (doi:10.1039/c2dt31075a), 2012-01-01
Supplement: c2dt31075a.pdf [file c2dt31075a.pdf]

Supporting Information for

# **Transfer hydrogenation with a ferrocene diamide ruthenium complex**

Andrew G. Elliott, Aaron G. Green, and Paula L. Diaconescu\*

*Department of Chemistry & Biochemistry, University of California, Los Angeles*

## **Table of Contents**

### Experimental

|                          |    |
|--------------------------|----|
| General procedures ..... | 2  |
| NMR spectra .....        | 3  |
| GC-MS data .....         | 10 |
| References .....         | 25 |

**General procedures:** All experiments were performed under a dry nitrogen atmosphere using standard Schlenk techniques or an MBraun inert-gas glovebox. Solvents were purified using a two-column solid-state purification system by the method of Grubbs<sup>1</sup> and transferred to the glove box without exposure to air. Acetophenone, 2-heptanone and pinacolone were purchased from Sigma and purified by vacuum distillation then stored over sieves in a nitrogen atmosphere. Benzophenone was purchased from Sigma and purified by crystallization from hexanes.  $\text{RuCl}_3 \cdot n\text{H}_2\text{O}$  and  $\text{PPh}_3$  were purchased from Acros.  $\text{RuCl}_2(\text{PPh}_3)_3$ ,<sup>2</sup>  $\text{fc}(\text{NH}_2)_2$ ,<sup>3</sup> and 1,1'-bis(diphenylphosphino)ferrocene<sup>4</sup> (dppf) were synthesized according to previously published procedures. NMR solvents were obtained from Cambridge Isotope Laboratories, degassed, and stored over activated molecular sieves prior to use.  $^1\text{H}$  NMR spectra were recorded on Bruker300 or Bruker500 spectrometers at room temperature in  $\text{C}_6\text{D}_6$  (the UCLA NMR spectrometers are supported by the NSF grant CHE-9974928). Chemical shifts are reported with respect to internal solvent, 7.16 ppm ( $\text{C}_6\text{D}_6$ ) for  $^1\text{H}$  NMR spectra. For  $^{31}\text{P}$  NMR spectra, chemical shifts are reported with respect to an external standard, 0 ppm (neat  $\text{H}_3\text{PO}_4$ ). GS-MS data were obtained on an Agilent 6890-5975 GC-MS equipped with an Agilent HP-5MS column and autosampler. Helium was used as the mobile phase at a column pressure of 14.25 psi. The injector temperature was 280 °C. Quadrupole MS was used for detection, with the MS source at 230 °C and the quadrupole at 150 °C.

## NMR Spectra

$^1\text{H}$  NMR spectrum of **1** (300 MHz,  $\text{C}_6\text{D}_6$ , 25 °C)

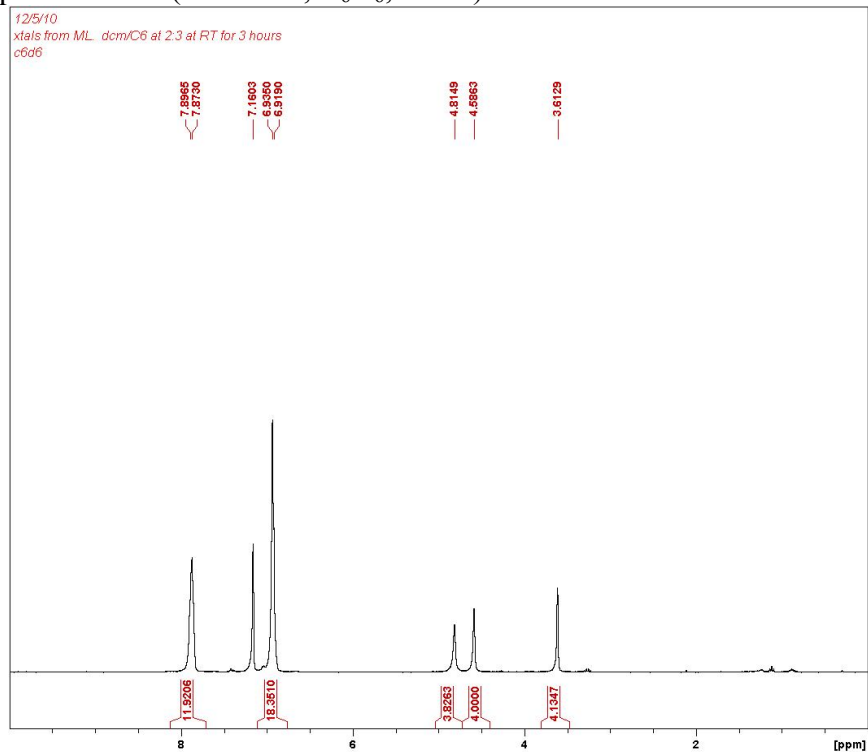

$^{31}\text{P}$  NMR spectrum of **1** (121 MHz,  $\text{C}_6\text{D}_6$ , 25 °C)

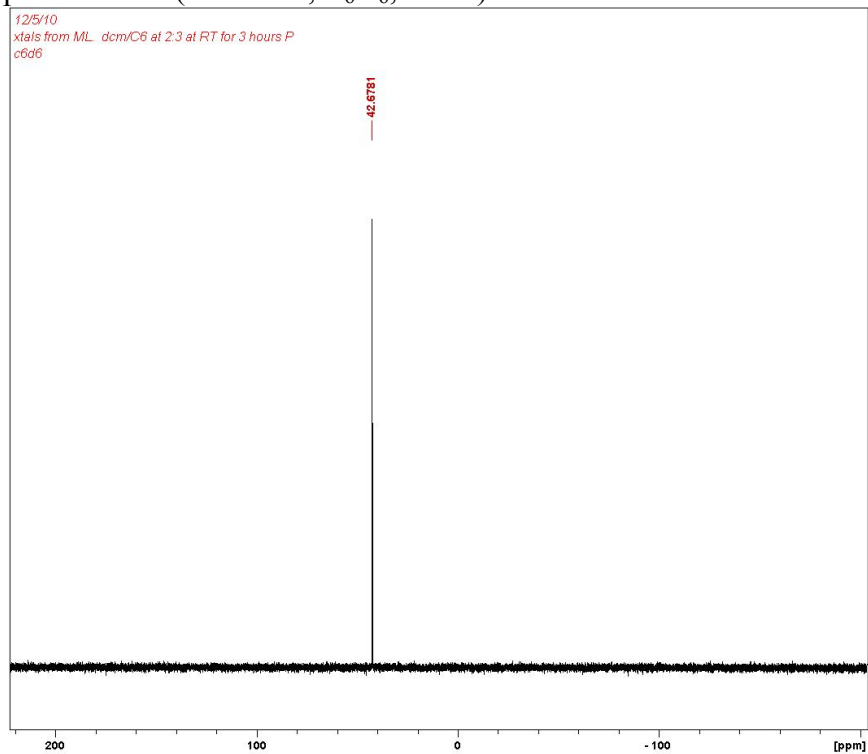

<sup>13</sup>C NMR spectrum of **1** (125 MHz, CDCl<sub>3</sub>, 23 °C)

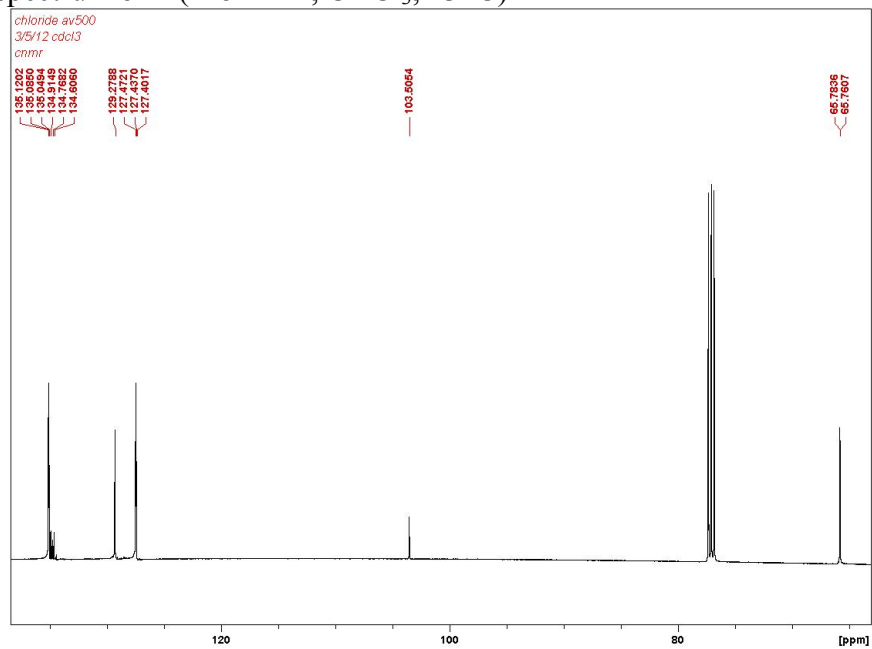

$^1\text{H}$  NMR spectrum of **2** (300 MHz,  $\text{C}_6\text{D}_6$ , 25 °C)

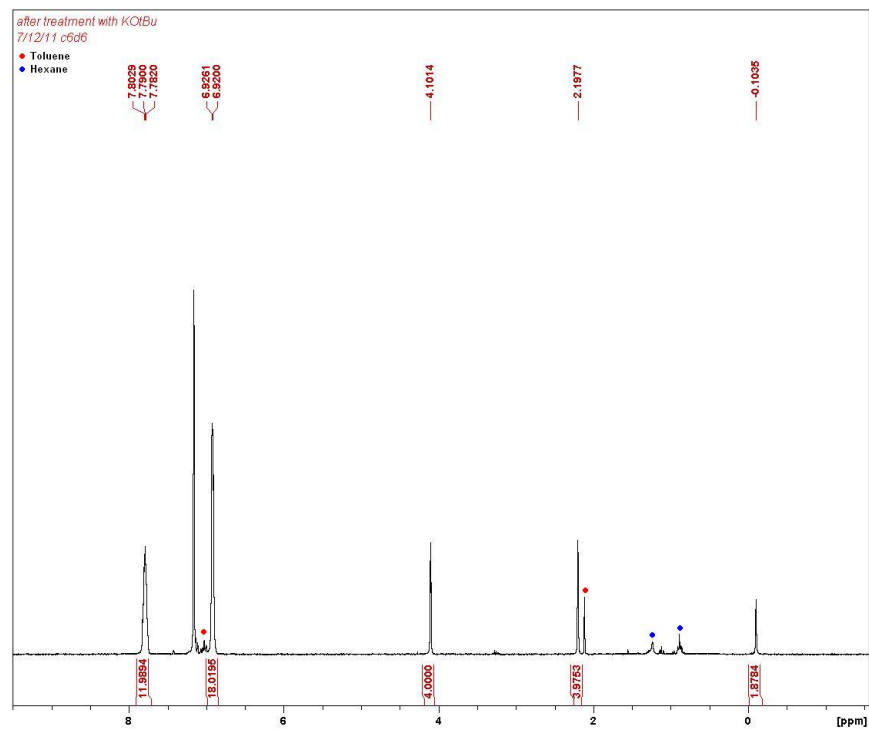

$^{31}\text{P}$  NMR spectrum of **2** (121 MHz,  $\text{C}_6\text{D}_6$ , 25 °C)

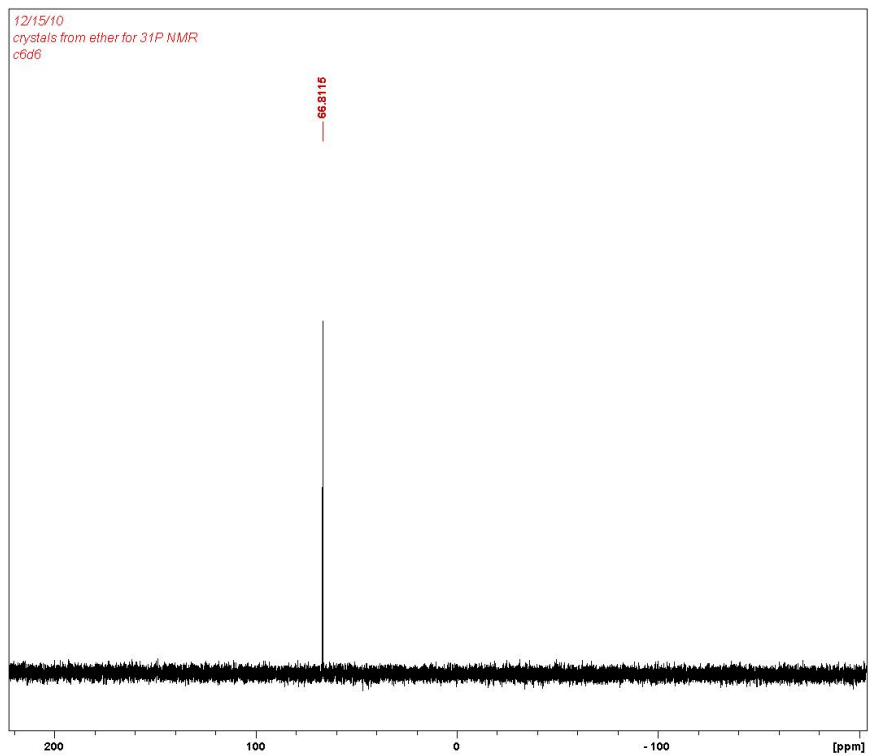

$^{13}\text{C}$  NMR spectrum of **2** (75 MHz,  $\text{C}_6\text{D}_6$ , 25 °C)

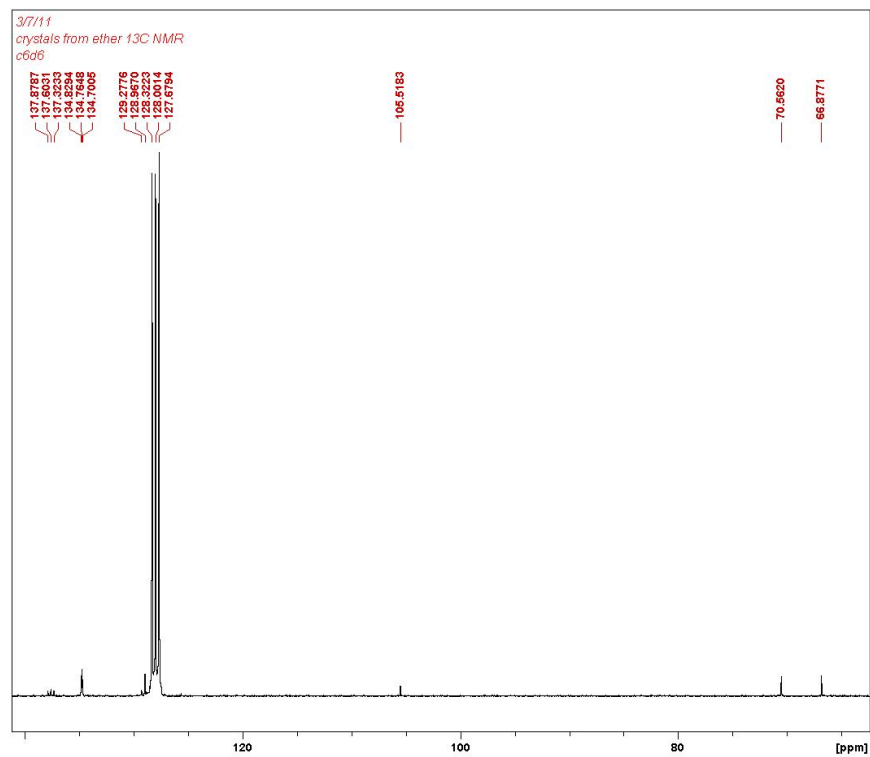

$^1\text{H}$  NMR spectrum of **3** (300 MHz,  $\text{C}_6\text{D}_6$ , 23 °C)

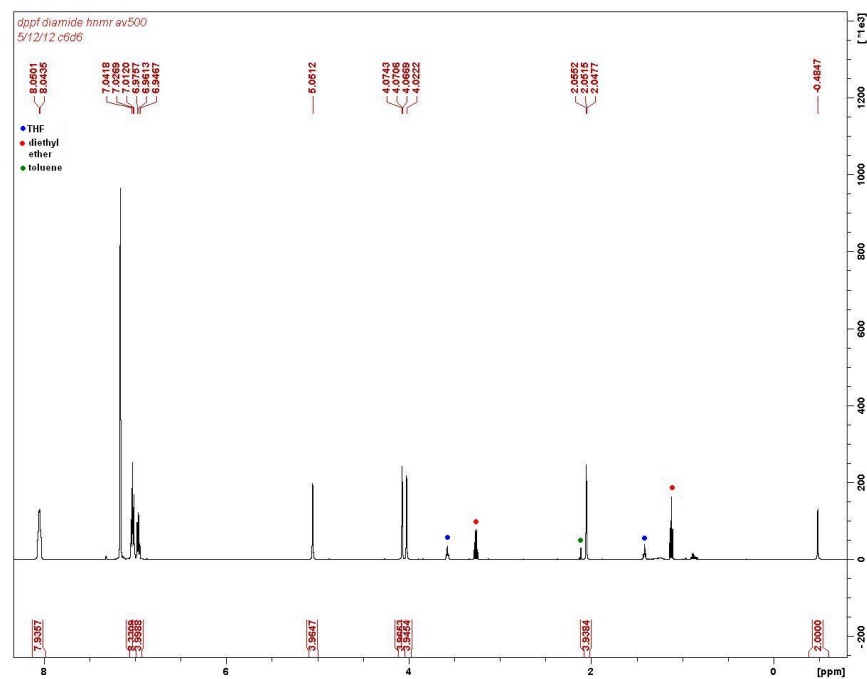

$^{31}\text{P}$  NMR spectrum of **3** (121 MHz,  $\text{C}_6\text{D}_6$ , 25 °C)

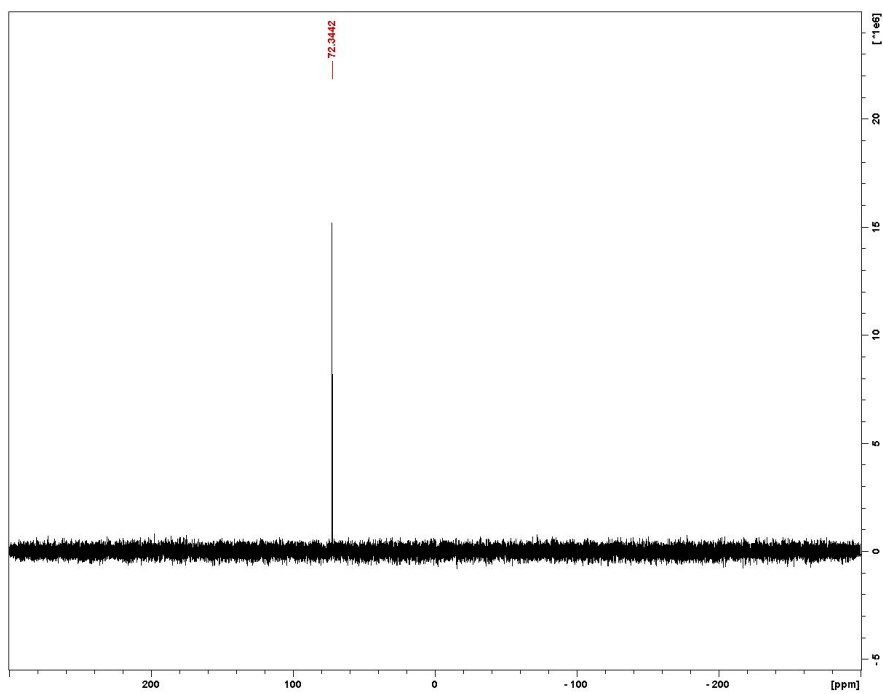





## Reaction of **2** with isopropanol

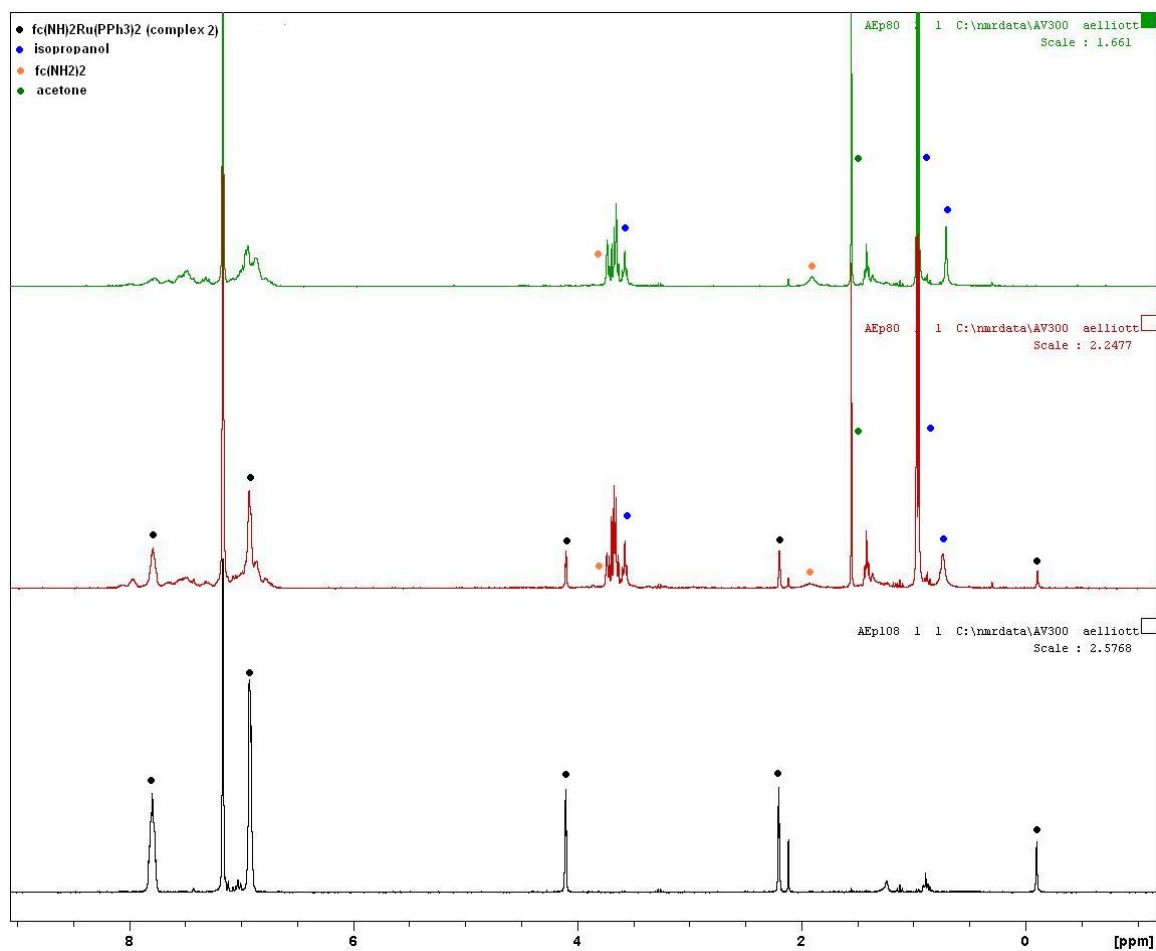

Upon treatment of **2** with excess isopropanol, the complex decomposes to form free  $\text{fc}(\text{NH}_2)_2$ .

### Transfer hydrogenation of acetophenone by 2

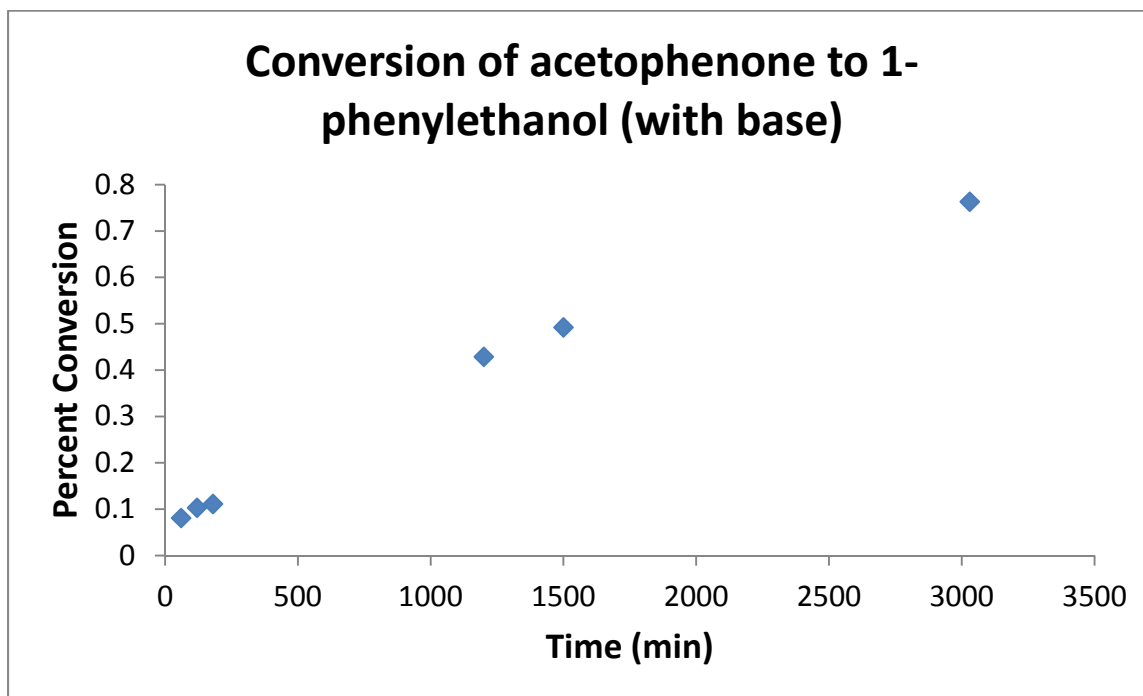

TON: 153

TOF: 19 h<sup>-1</sup>

76% conversion in 50 h

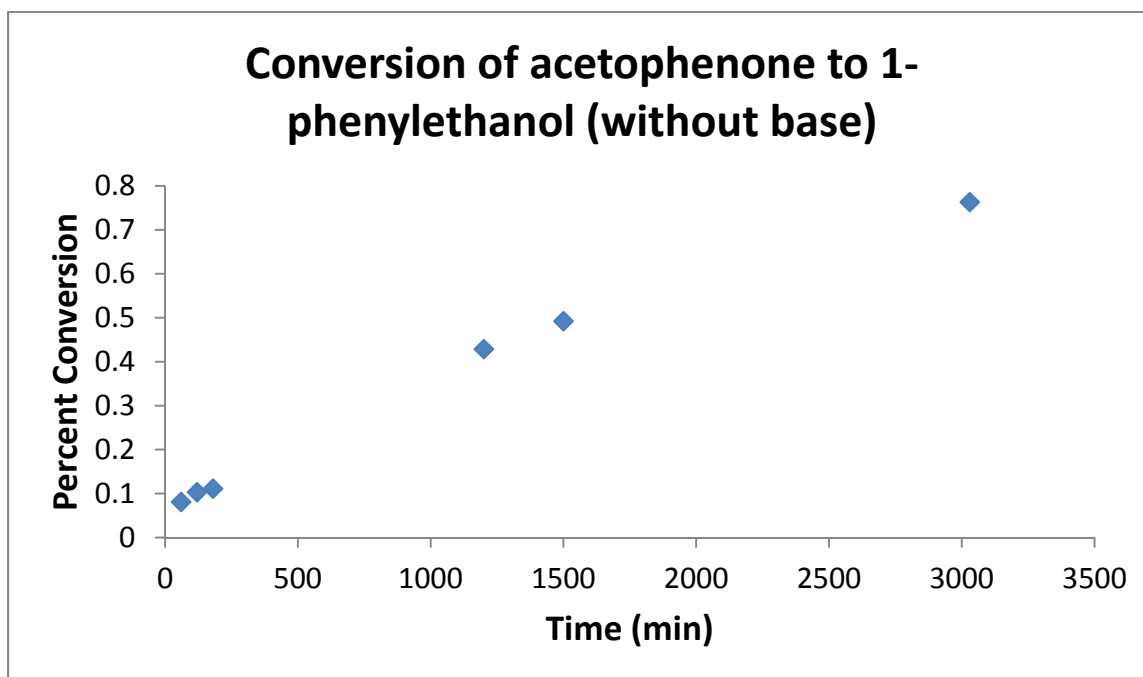

TON: 144

TOF: 16.5 h<sup>-1</sup>

72% conversion in 50 h

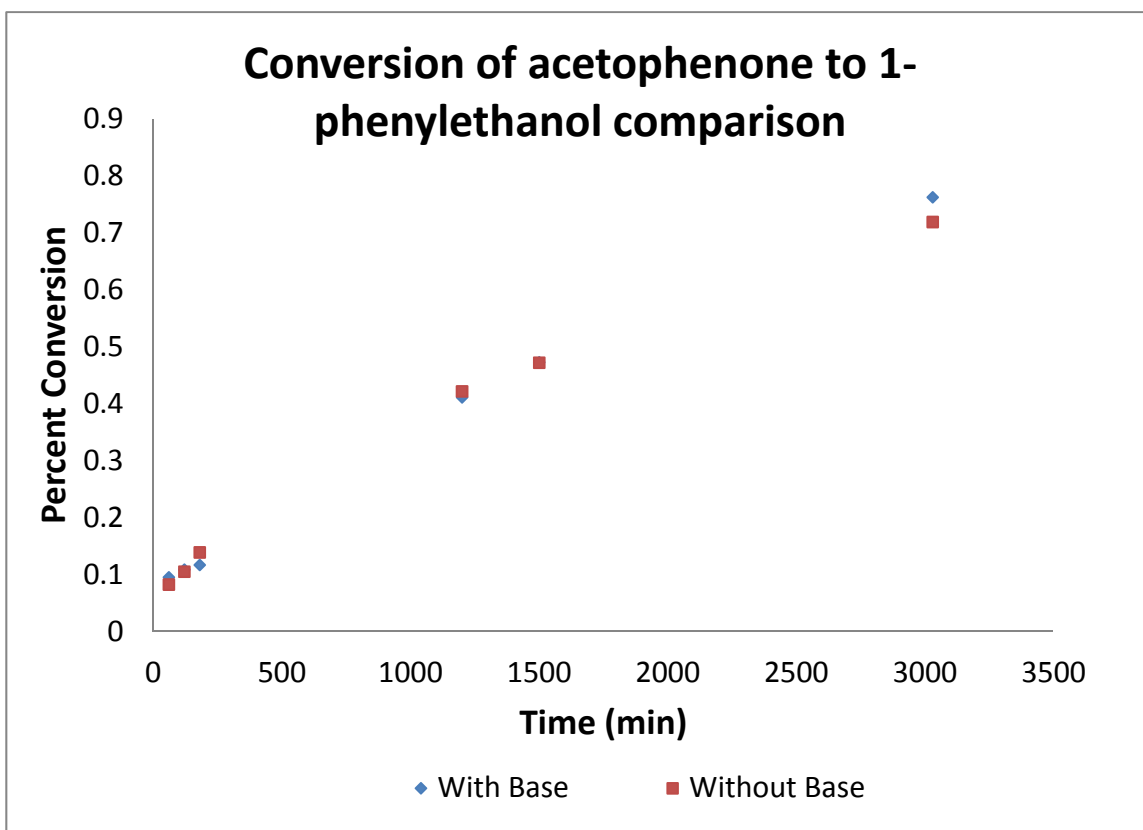

**Transfer hydrogenation of 2-heptanone by 2**

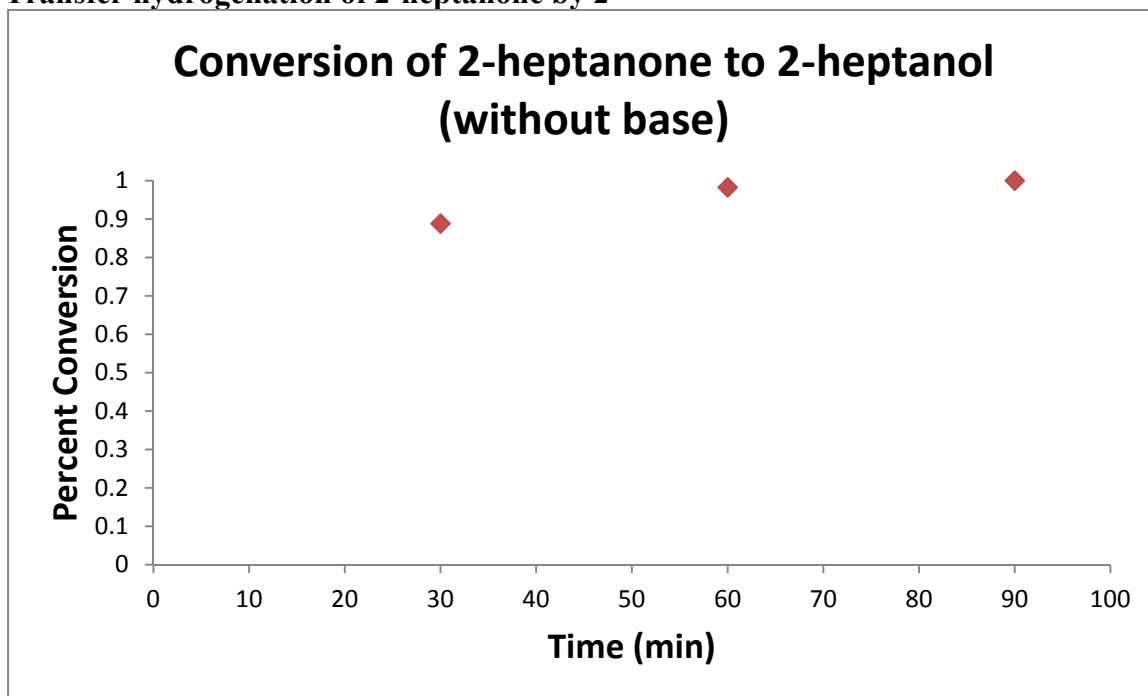

TON: 200

TOF: 339 h<sup>-1</sup>

100% conversion in 1.5 h

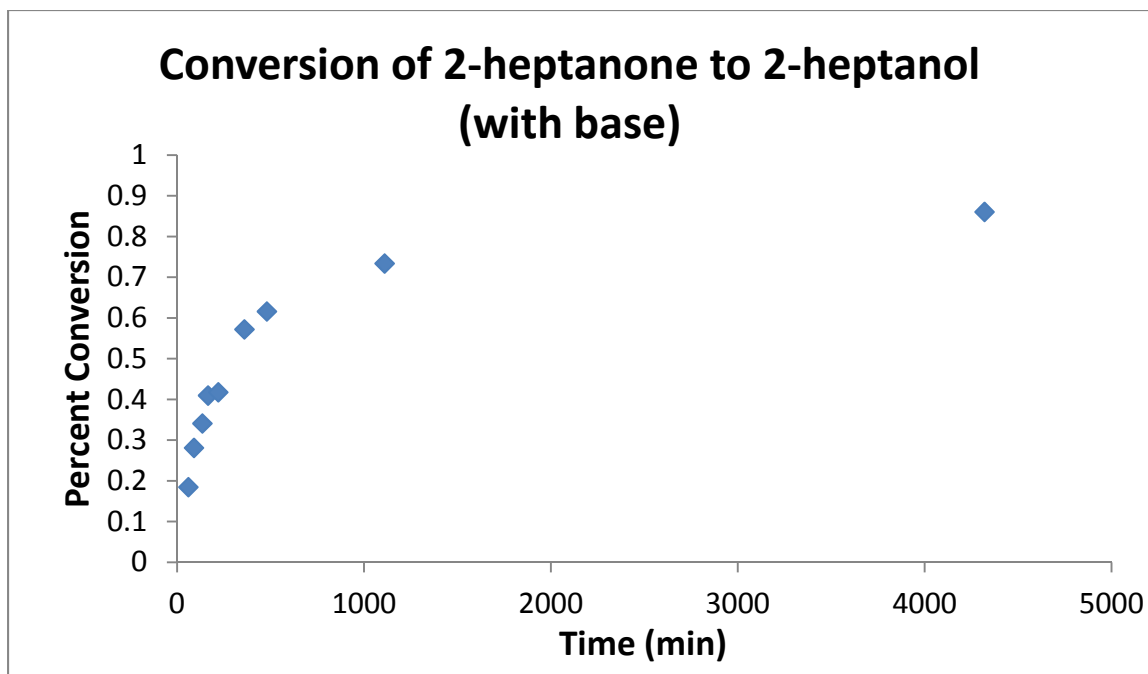

TON: 172

TOF: 36 h<sup>-1</sup>

84% conversion in 72 h

**Transfer hydrogenation of pinacolone by 2**

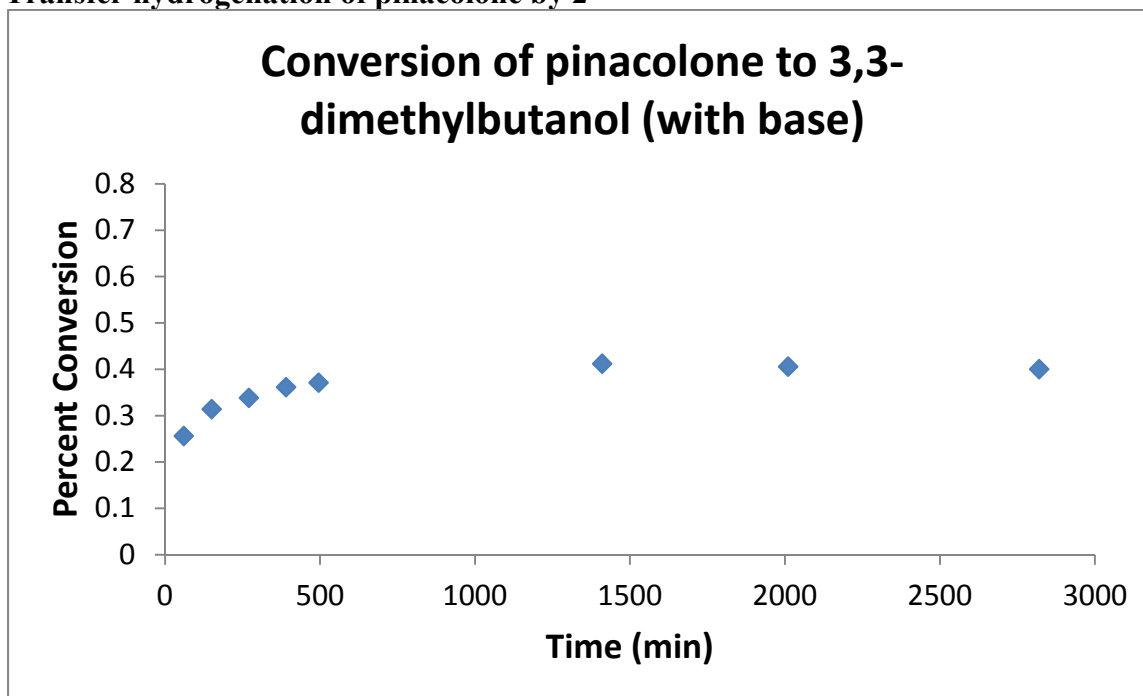

TON: 82

TOF: 51 h<sup>-1</sup>

41% conversion in 24 h

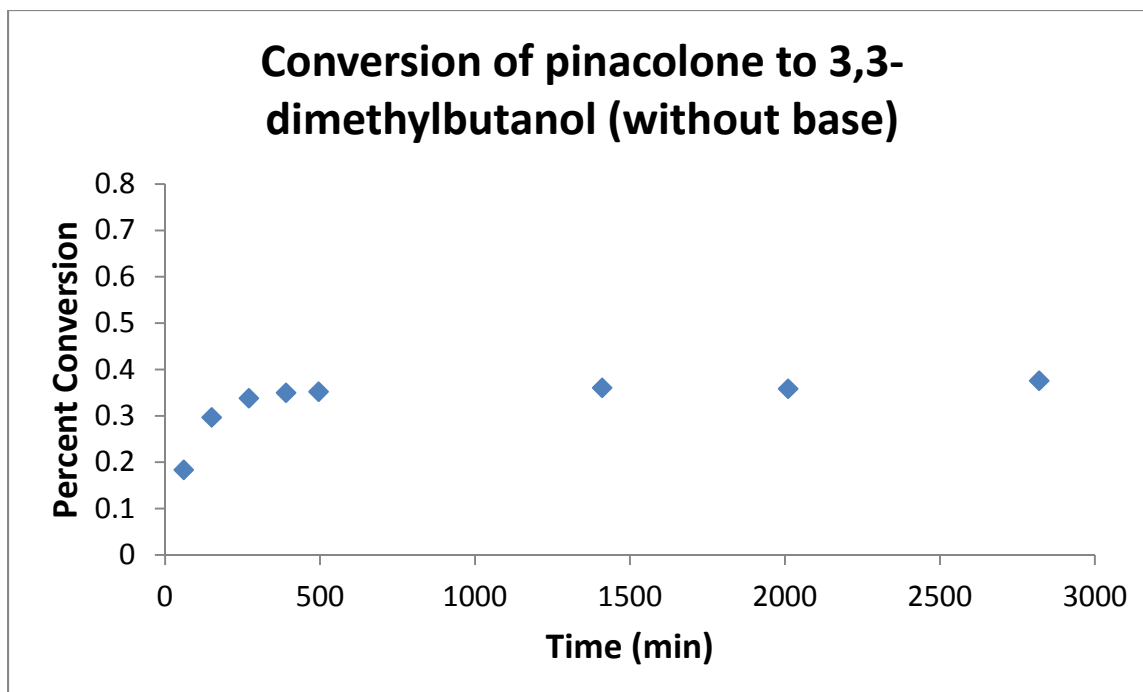

TON: 75

TOF: 37 h<sup>-1</sup>

36% conversion in 24 h

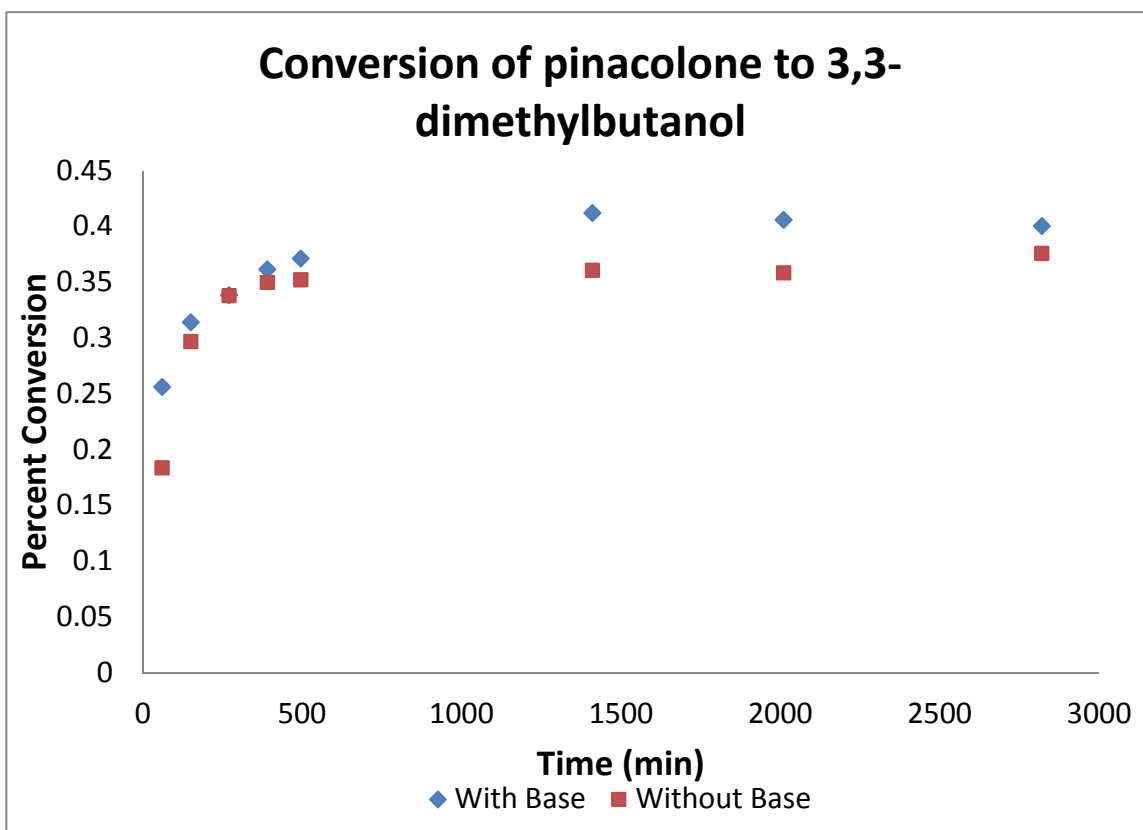

**Transfer hydrogenation of benzophenone by 2**

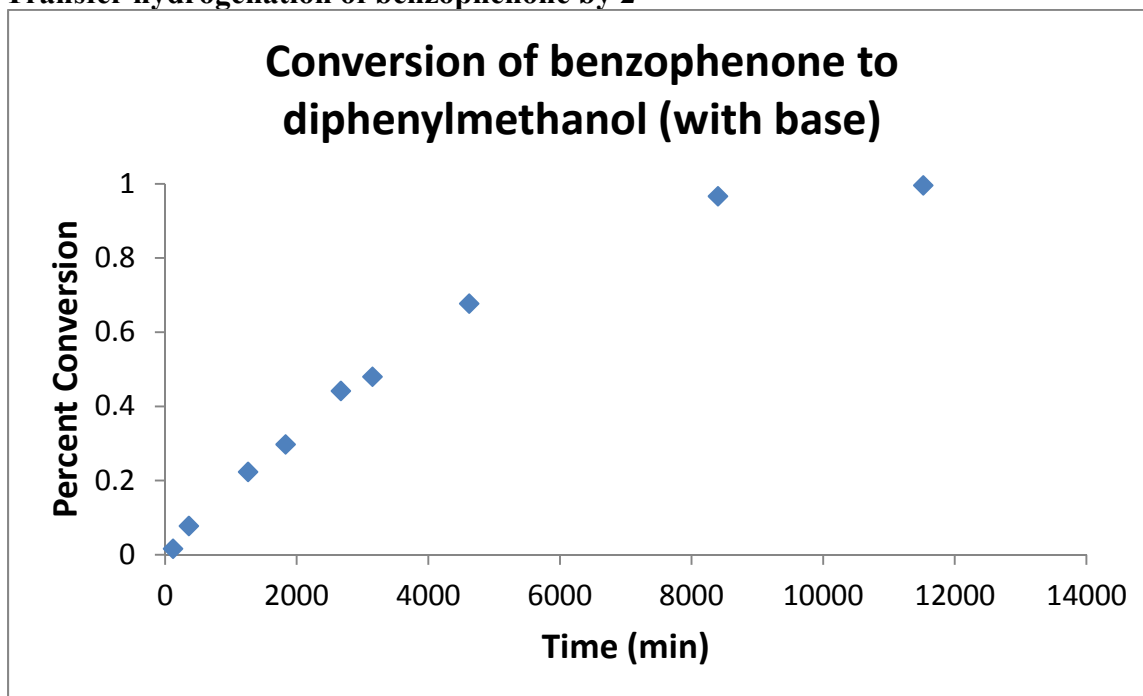

TON: 199

TOF: 3 h<sup>-1</sup>

99% conversion in 1 week

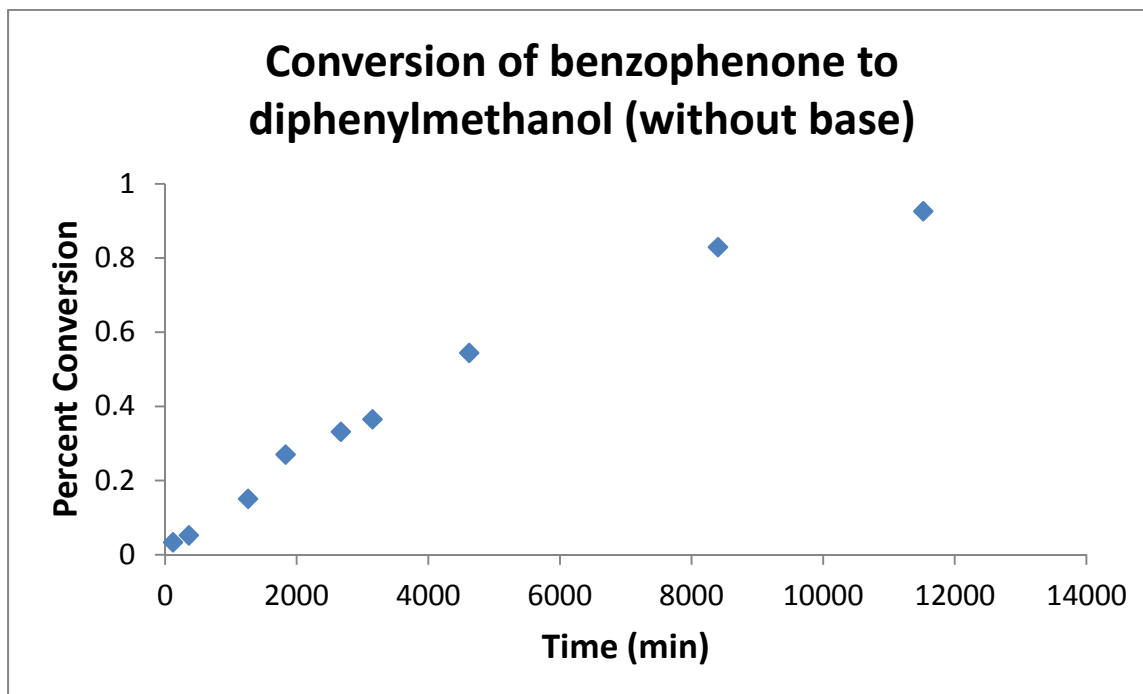

TON: 185

TOF: 7 h<sup>-1</sup>

93% conversion in 1 week

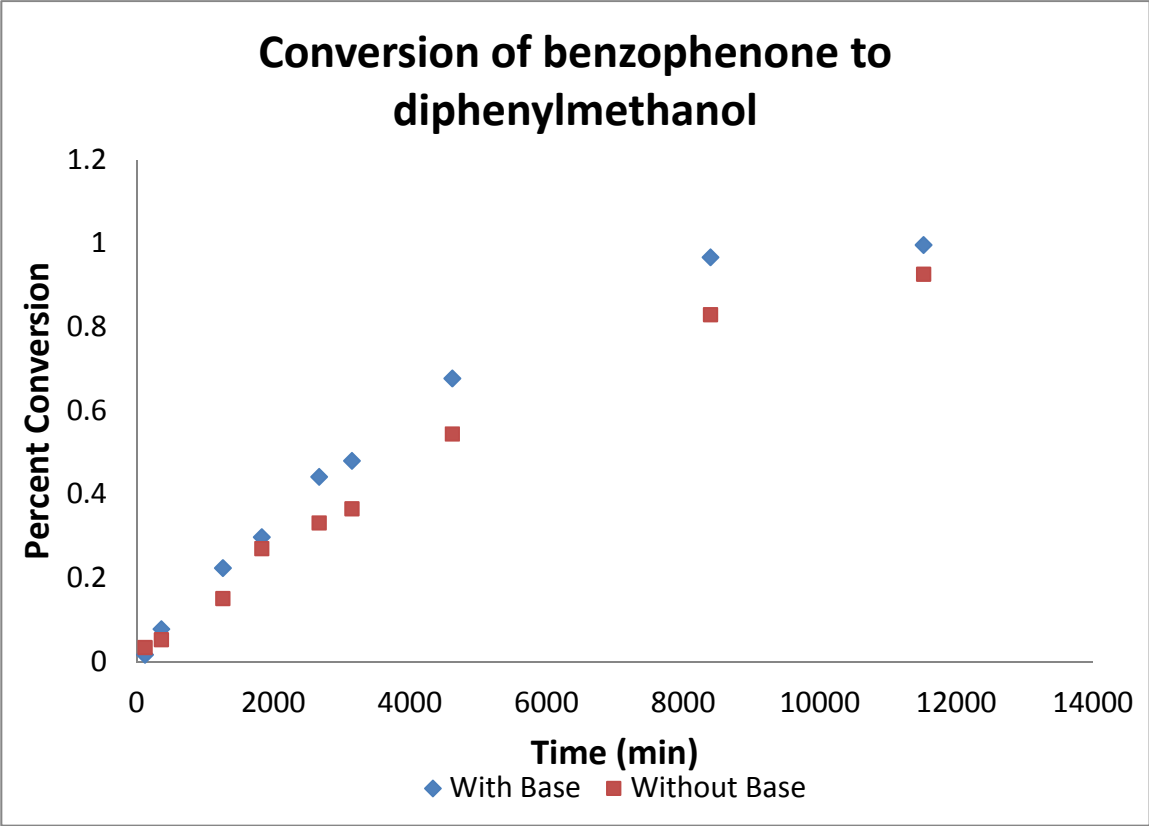



**Transfer hydrogenation of acetophenone by 3**

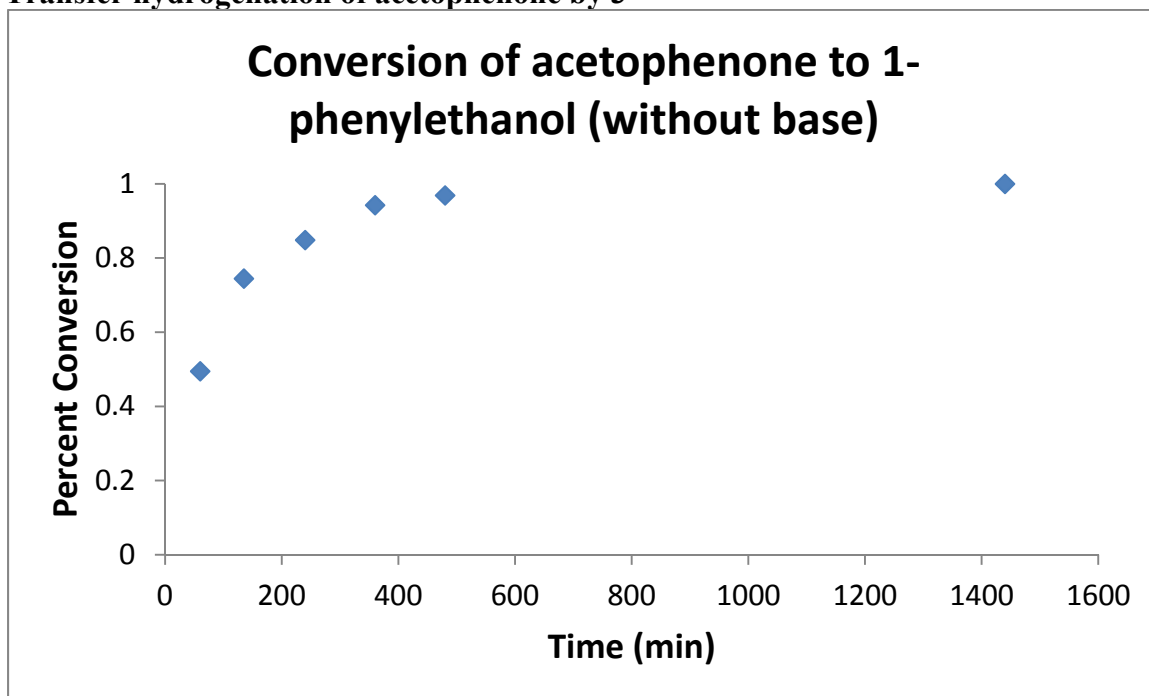

TON: 200

TOF: 99 h<sup>-1</sup>

100% conversion in 1 day

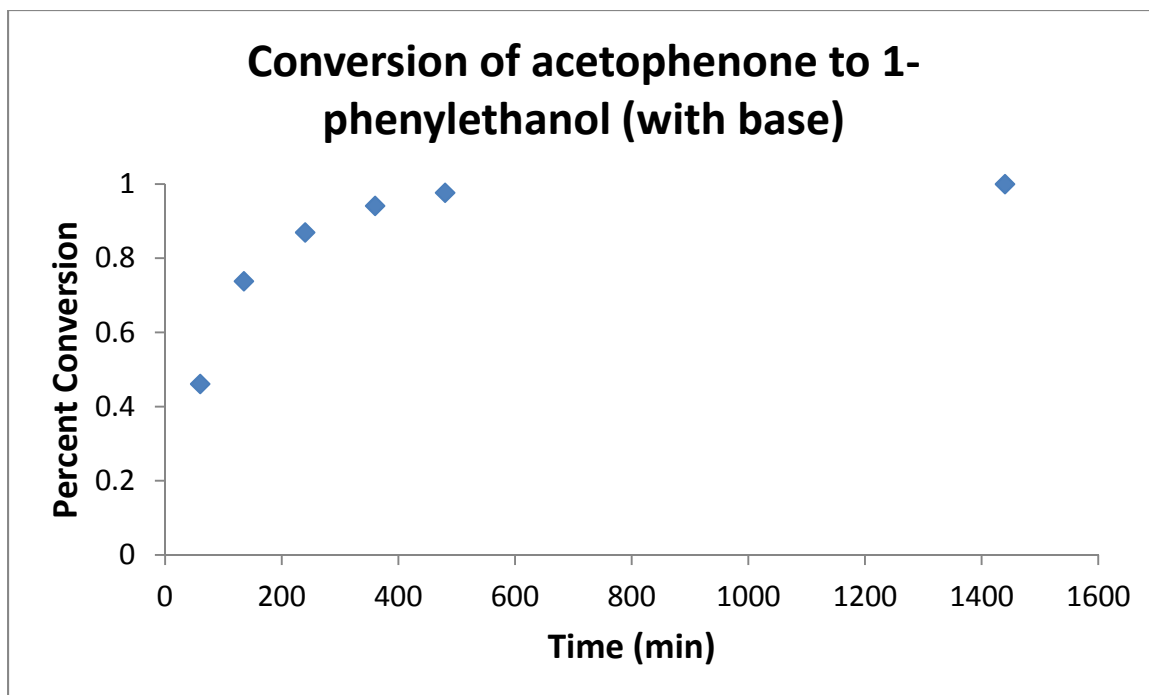

TON: 200

TOF: 92 h<sup>-1</sup>

100% conversion in 1 day

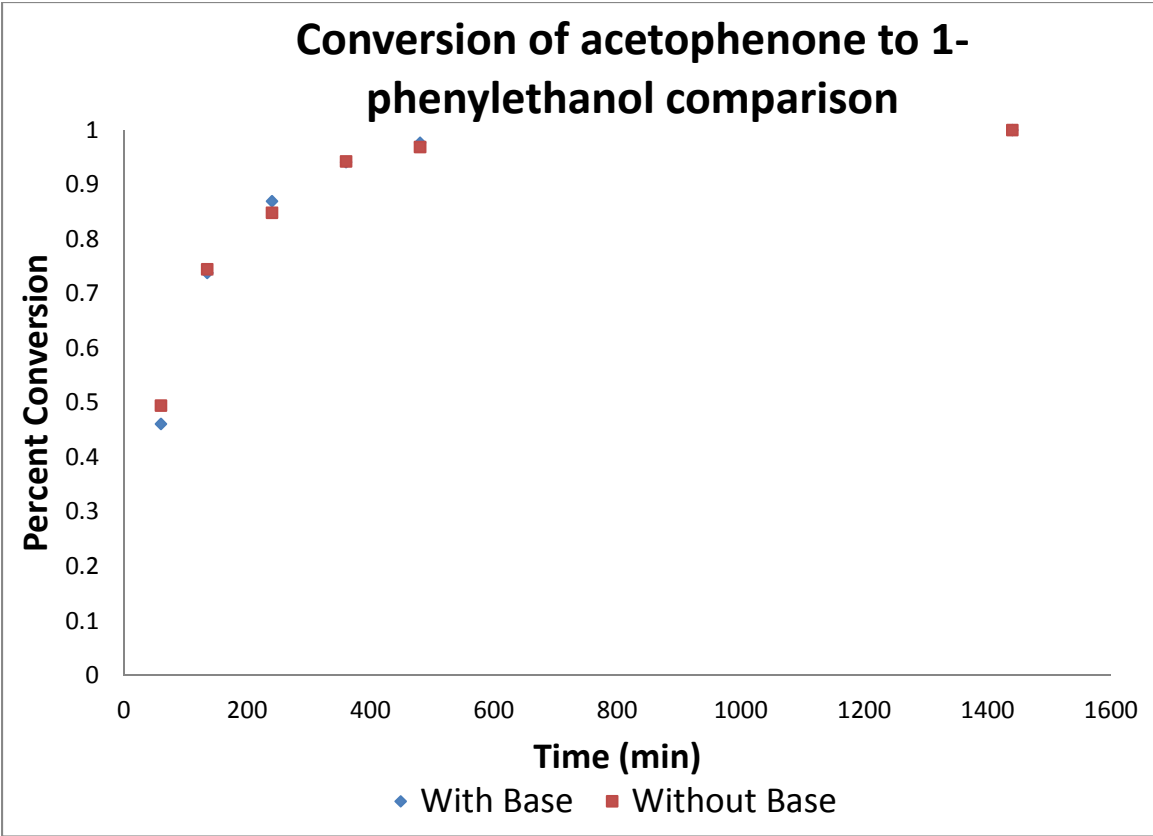

**Transfer hydrogenation of 2-heptanone by 3**

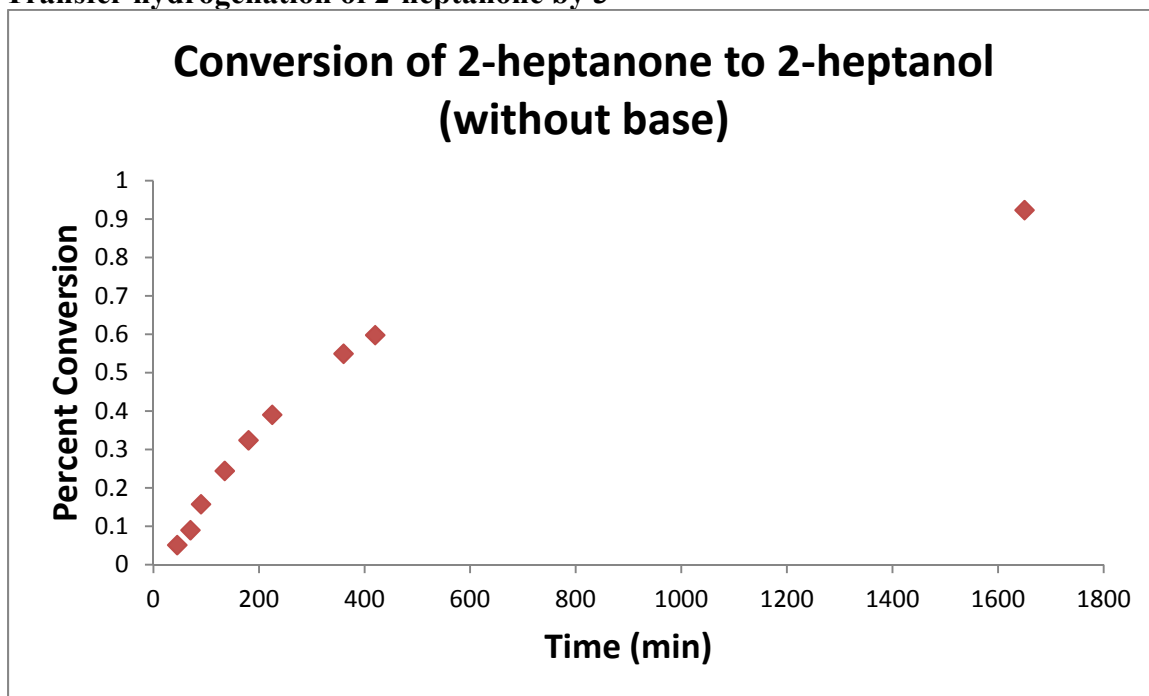

TON: 185

TOF: 41 h<sup>-1</sup>

92% conversion in 27.5 hours

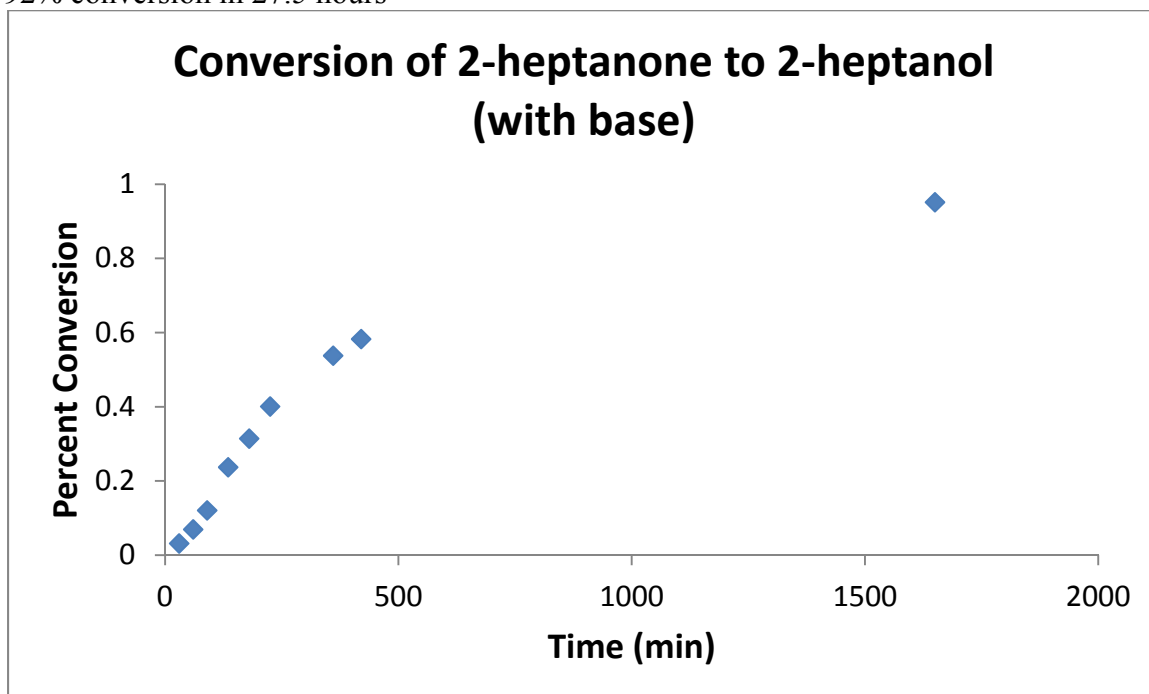

TON: 190

TOF: 36 h<sup>-1</sup>

95% conversion in 27.5 hours

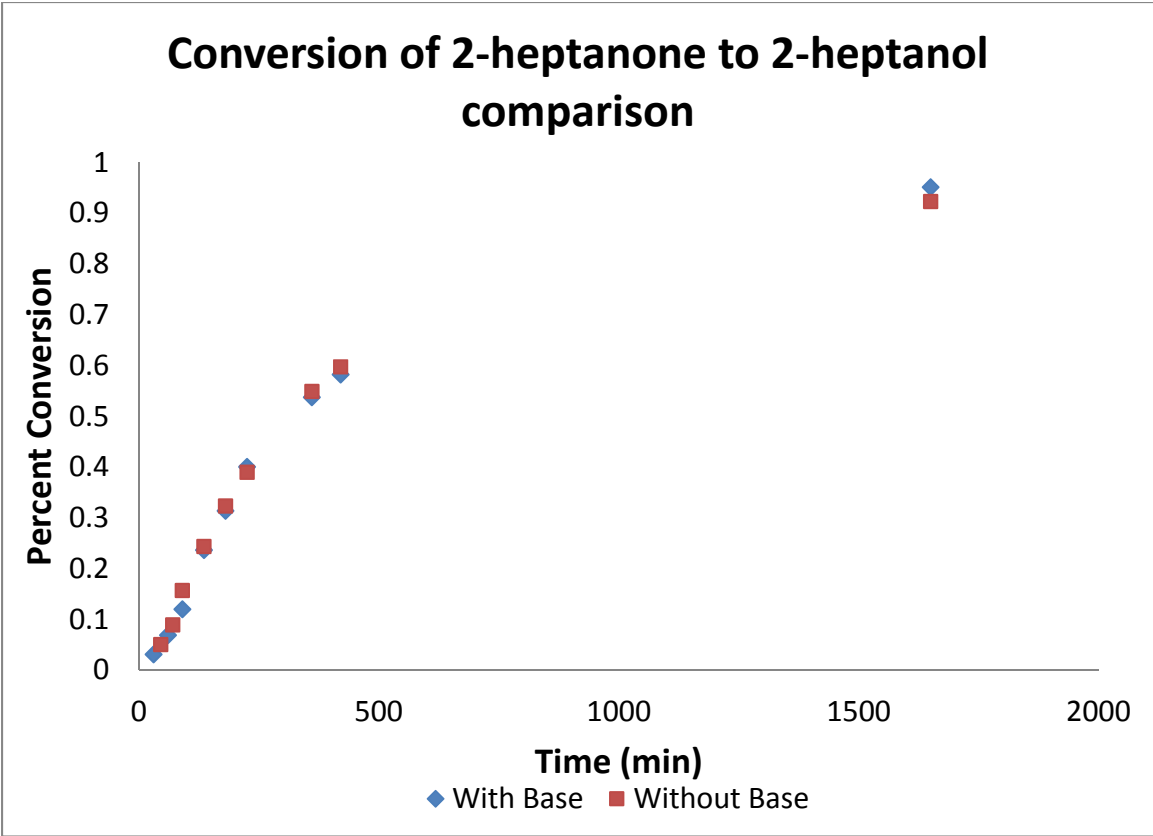

**Transfer hydrogenation of benzophenone by 3**

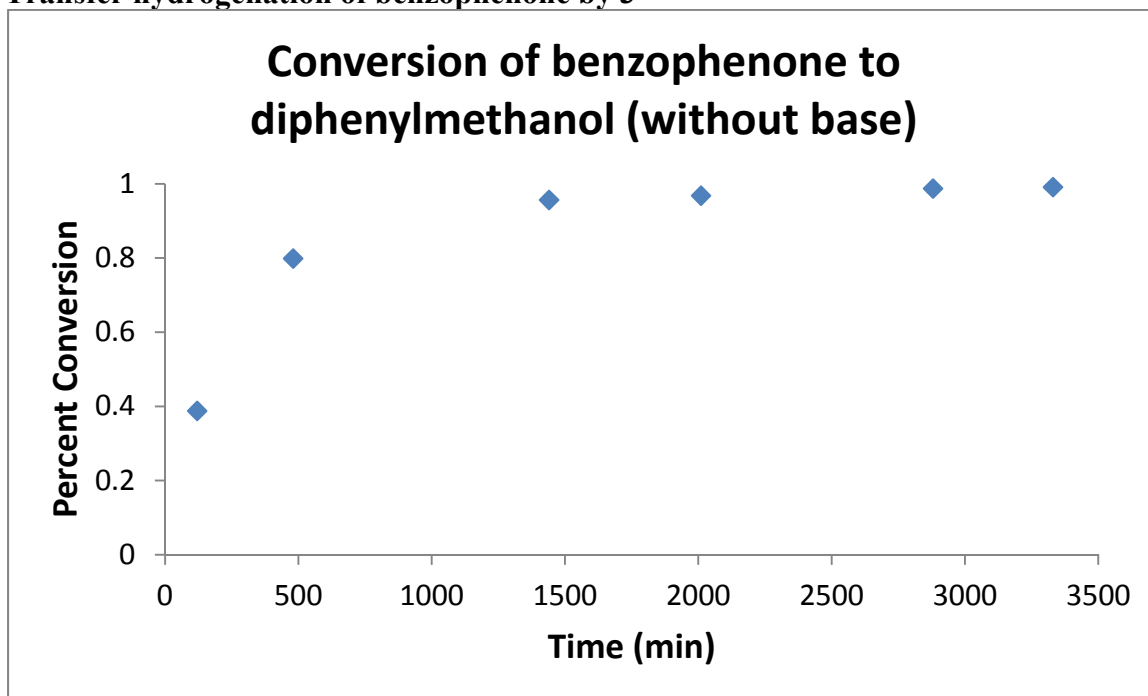

TON: 198

TOF: 38 h<sup>-1</sup>

99% conversion in 55.5 hours

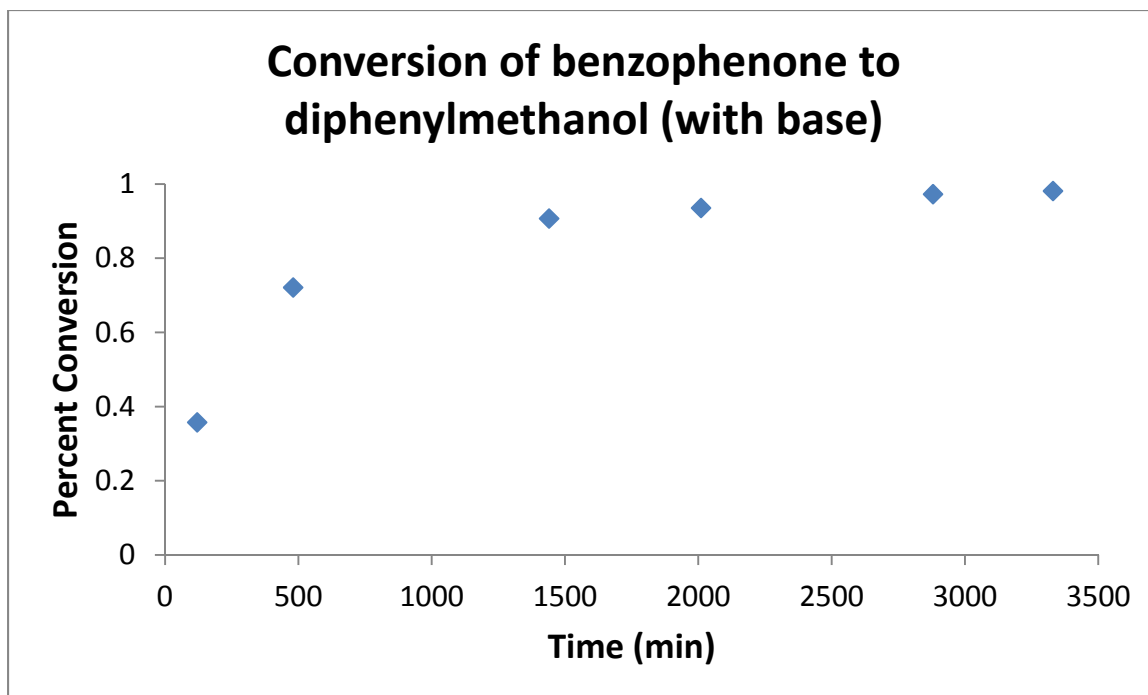

TON: 196

TOF: 36 h<sup>-1</sup>

98% conversion in 55.5 hours

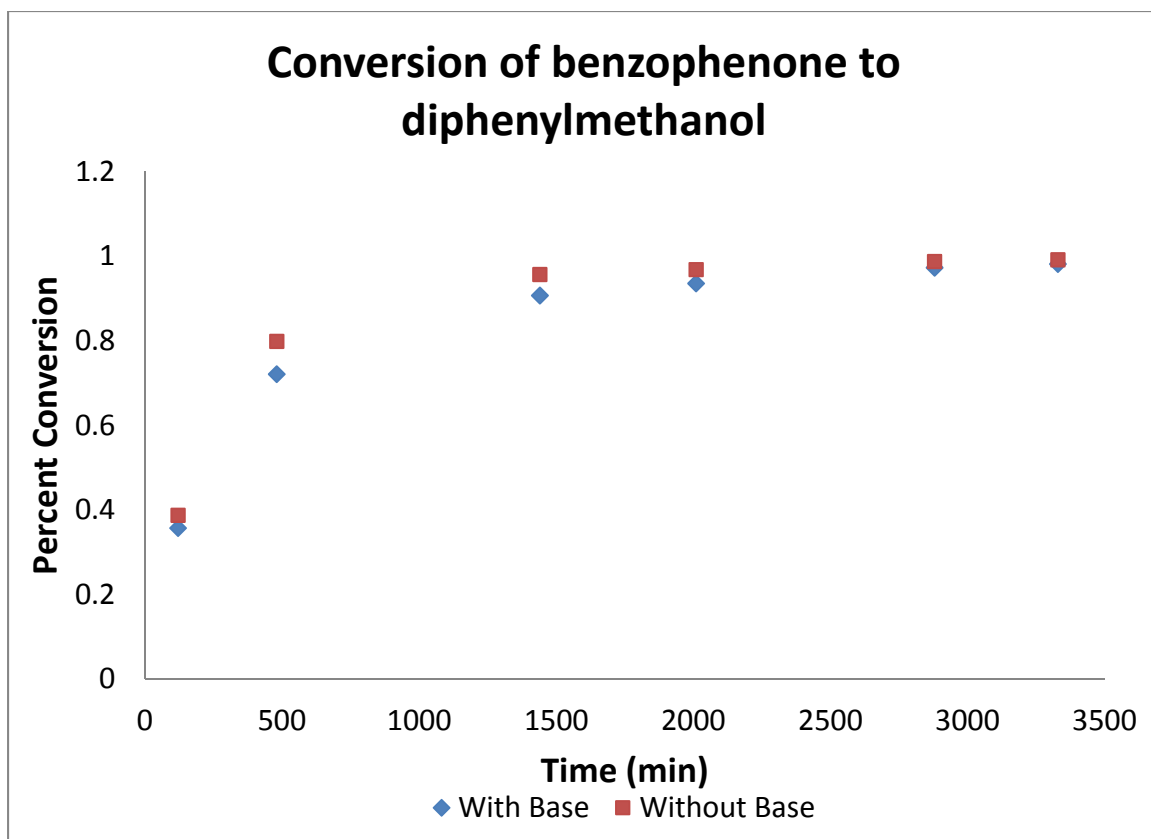

**Transfer hydrogenation of pinacolone by 3**

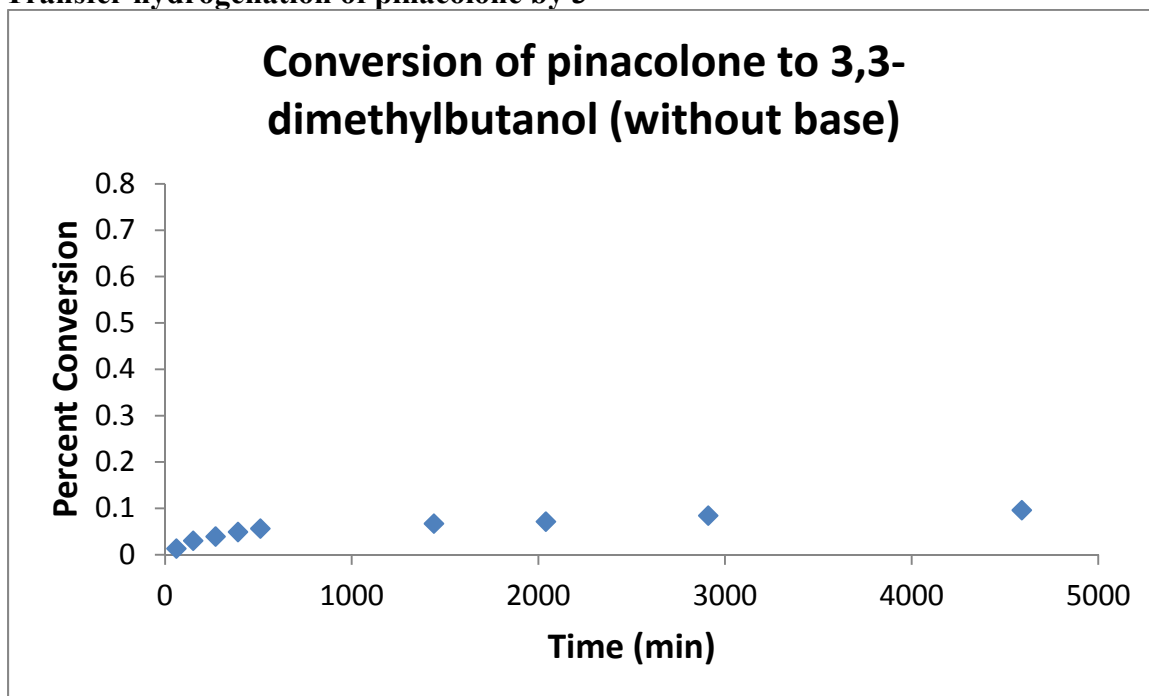

TON: 19

TOF: 3 h<sup>-1</sup>

10% conversion in 76.5 hours

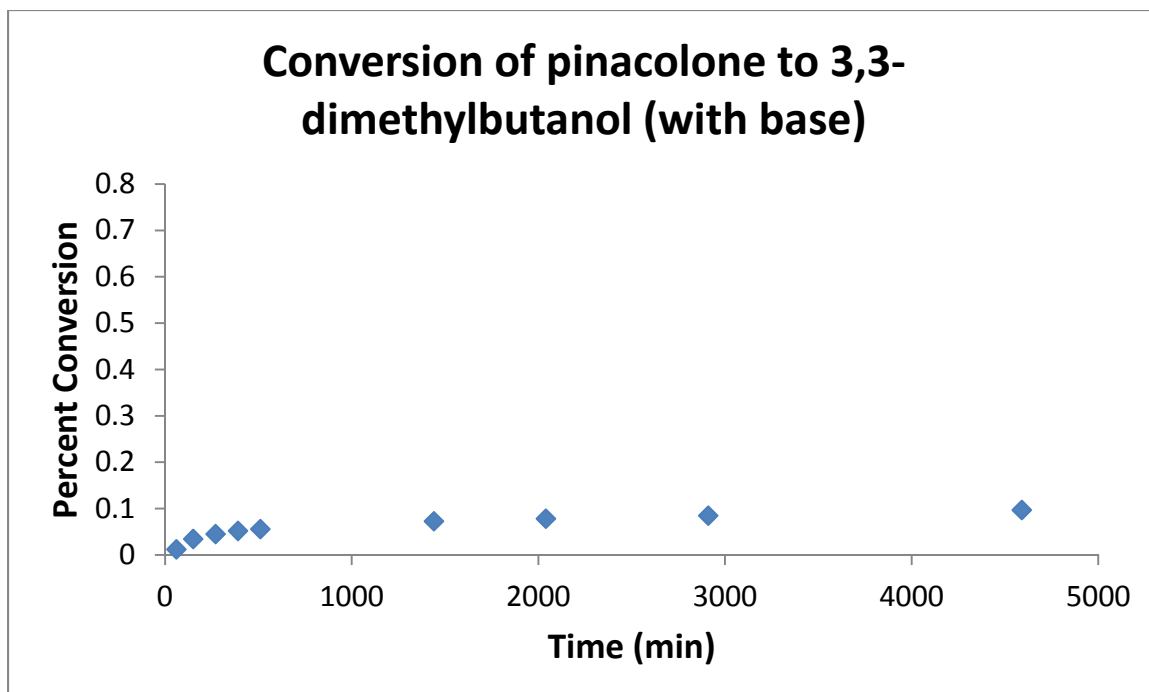

TON: 19

TOF: 3 h<sup>-1</sup>

10% conversion in 76.5 hours

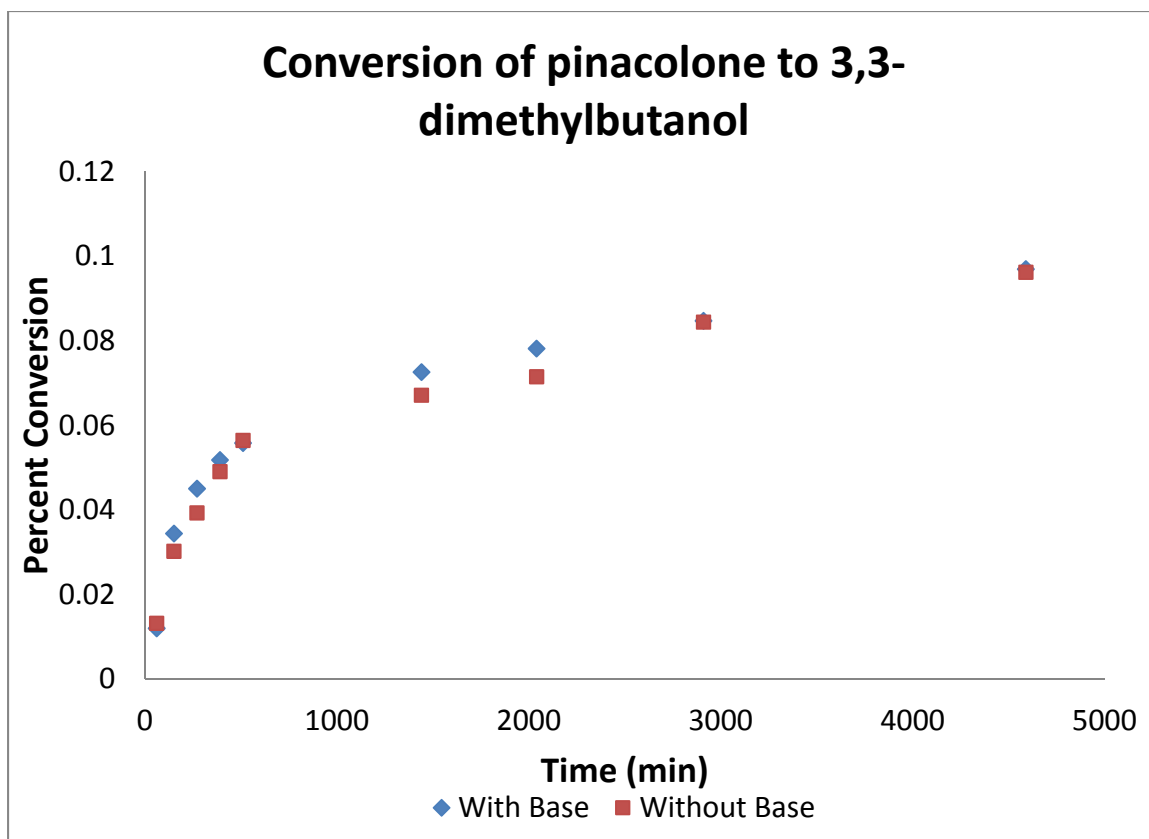



## References

1. A. B. G. Pangborn, M. A.; Grubbs, R. H.; Rosen, R. K.; Timmers, F. J., *Organometallics*, 1996, **15**, 1518.
2. M. A. H. Fox, J. E.; Heider, S.; Pérez-Gregorio, V.; Zakrzewska, M. E.; Farmer, J. D.; Yufit, D. S.; Howard, J. A.K.; Low, P. J., *J. Organomet. Chem.*, 2009, **694**, 2350.
3. M. J. Monreal, C. T. Carver and P. L. Diaconescu, *Inorg. Chem.*, 2007, **46**, 7226-7228.
4. J. J. Bishop, A. Davison, M. L. Katcher, D. W. Lichtenberg, R. E. Merrill and J. C. Smart, *J. Organomet. Chem.*, 1971, **27**, 241-249.
